# Supplementary material for: The small G protein Arf6 expressed in keratinocytes by HGF stimulation is a regulator for skin wound healing
Source: PubMed Central journal article supplement (PMC5399375; doi:10.1038/srep46649), 2017-04-21
Supplement: srep46649-s1.pdf [file srep46649-s1.pdf]

Supplementary Figure

**The small G protein Arf6 expressed in keratinocytes by HGF stimulation is a  
regulator for skin wound healing**

Yuki Miura, Ngo Thai Bich Van, Momoko Furuya, Hiroshi Hasegawa, Satoru  
Takahashi, Naohiro Katagiri, Tsunaki Hongu, Yuji Funakoshi, Norihiko Ohbayashi,  
Yasunori Kanaho

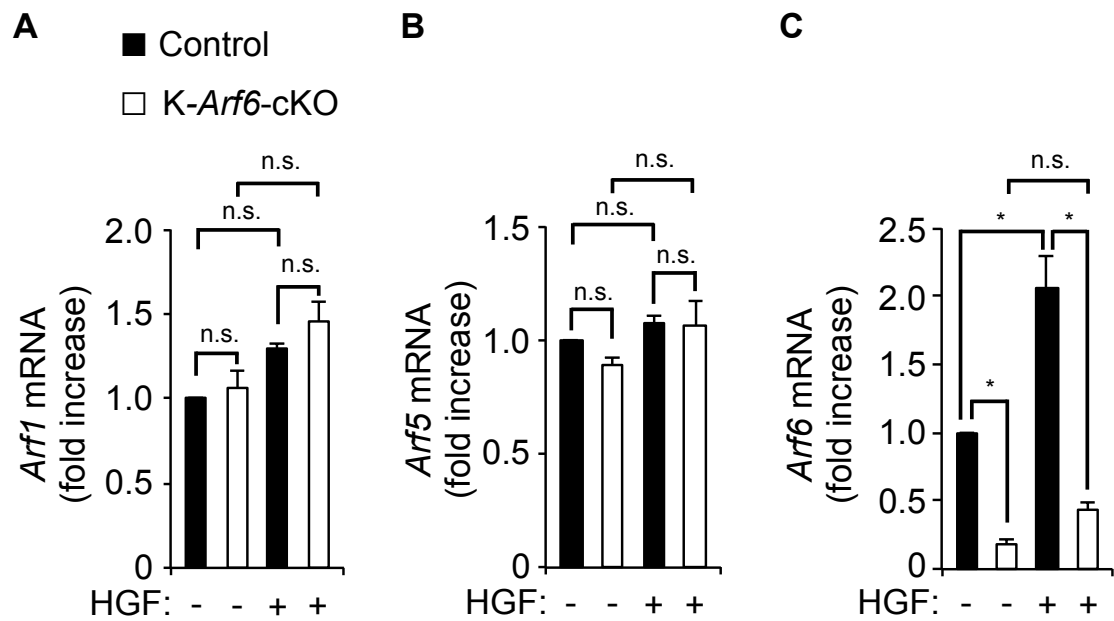

**Supplementary Figure S1. Expression levels of *Arf1*, *5* and *6* mRNA in primary cultured keratinocytes prepared from control and K-*Arf6*-cKO mice.** Primary cultured keratinocytes prepared from control and K-*Arf6*-cKO mice were stimulated without or with 50 ng/ml of HGF for 3 hr, then *Arf1* (A), *Arf5* (B) and *Arf6* mRNA levels (C) were analyzed by qPCR. Data show the means  $\pm$  SEM from three independent experiments. Statistical significance was assessed by one-way ANOVA with Scheffe's post-hoc test; \* $P$ <0.05, n.s., not significant.
